# Supplementary material for: A Study on Pubmed Search Tag Usage Pattern: Association Rule Mining of a Full-day Pubmed Query Log
Source: Springer Nature journal article supplement (doi:10.1186/1472-6947-13-8), 2013-01-09
Supplement: 12911_2012_604_MOESM1_ESM.pdf [file 12911_2012_604_MOESM1_ESM.pdf]

5SBsAAAAY|82|diabetes mellitus and neuropathy

7DqtIIIOF|oAABo-r9UAAAAE|446|"Aspirin"[MeSH] and free salicylic acide

s-LMcYIOFIkAADaxCXMAAAAL|24046|J Antibiot[TA] AND 40[VI] AND 7[PG] AND 1987[DP]

arkjdYIOFIwAADUCzY0AAAAG|24074|woods[au]

WgffYIIOFpEAAHaOjOEAAAAC|24079|GP1b position on platelet membranes

zWovJ4IOFkAAADQMyc8AAAAG|29893|GNAI1 AND diabetes

zPJiPoIOFkMAACmULUoAAAAE|29915|#1 AND #2 AND #3

Ht4IOFI0AAHqBXgkAAAAR|29928|(cohen[auth]) AND (750[page]) AND (2005[pdat])

8FO2bIIOFkEAABu6iXEAAAAM|86386|sleep and weight gain

0Mp-pYIOFj8AAHitW4sAAAAP|86399|chronic lithium stroke
